# Supplementary material for: WNT signaling pathway regulator-FRAT2 affects oncogenesis and prognosis of basal-like breast cancer
Source: PubMed Central journal article supplement — J Thorac Dis. 2020 Jul;12(7):3478–87. doi: 10.21037/jtd-20-1557A (PMC7399388; doi:10.21037/jtd-20-1557a), 2020-07
Supplement: jtd-12-07-3478-dss.pdf [file jtd-12-07-3478-dss.pdf]

## Data Sharing Statement

|                     |                                                                                                                                                    |                                                                                                                                                                 |
|---------------------|----------------------------------------------------------------------------------------------------------------------------------------------------|-----------------------------------------------------------------------------------------------------------------------------------------------------------------|
| <b>Article Info</b> | Article information: <a href="http://dx.doi.org/10.21037/jtd-20-1557A">http://dx.doi.org/10.21037/jtd-20-1557A</a> .                               |                                                                                                                                                                 |
| <b>Item</b>         | <b>Question</b>                                                                                                                                    | <b>Authors' Response<br/>(place "-" if not applicable)</b>                                                                                                      |
| 1                   | Would you like to share data collected for your study to others?                                                                                   | Yes                                                                                                                                                             |
| 2                   | If not, would you like to share the reason for your decision?                                                                                      | -                                                                                                                                                               |
| 3                   | What data in particular will be shared?                                                                                                            | The expression data of FRAT2 in BLBC patients was valuable for the further research on the molecular mechanism of FRAT2 for being a potential treatment target. |
| 4                   | Any other documents will be share? Such as study protocol, statistical analysis plan, informed consent form, clinical study report, analytic code. | Study protocol, statistical analysis plan, informed consent form will also be shared if request.                                                                |
| 5                   | When will data availability begin?                                                                                                                 | From the publication date.                                                                                                                                      |
| 6                   | When will data availability end?                                                                                                                   | Two years within the publication date, since the technique or survival data may be updated over time.                                                           |
| 7                   | To whom will you share the data?                                                                                                                   | Medical oncologists and breast surgeons who are interested in studies of FRAT2.                                                                                 |
| 8                   | For what type of analysis or purpose?                                                                                                              | For verify the role of FRAT2 as a potential target for BLBC treatment.                                                                                          |
| 9                   | How or where can the data/documents be obtained?                                                                                                   | Emails could be sent to the address below to obtain the shared data:<br>yfylitaiyuan@163.com                                                                    |
| 10                  | Any other restrictions?                                                                                                                            | We may balance the potential benefits and risks for each request and then provide the data that could be shared.                                                |
